# Supplementary material
Source: publisher site journal article supplement (https://www.dovepress.com/article/380480)
Supplement: Supplementary file 1 [file get_supplementary_file.php]

**Supplementary table 1** Odds ratios (95% confidence intervals) for the occurrence of adverse neonatal size according to the SF at 16-18th and 28-32th weeks of gestation.

|  | SF at 16-18th weeks of gestation (ug/L) | | | | | SF at 28-32th weeks of gestation (ug/L) | | | | |
| --- | --- | --- | --- | --- | --- | --- | --- | --- | --- | --- |
| Quartile 1  ＜18.32 | Quartile 2  18.32 - 31.3 | Quartile 3  31.34 - 55.90 | Quartile 4  ＞55.90 | *P* trend | Quartile 1  ＜16.01 | Quartile 2  16.01-23.91 | Quartile 3  23.91-32.71 | Quartile 4  ＞32.71 | *P* trend |
| Tall stature at birth |  |  |  |  |  |  |  |  |  |  |
| Rate (%) | 32 (5.5%) | 25 (4.3%) | 34 (5.8%) | 33 (5.7%) | 0.646 | 21 (3.6%) | 33 (5.7%) | 32 (5.5%) | 38 (6.5%) | 0.153 |
| OR (95% CI) | 1.00 (ref) | 0.78 (0.46, 1.33) | 1.07 (0.65,1.76) | 1.04 (0.63, 1.72) | 0.648 | 1.00 (ref) | 1.61 (0.92, 2.81) | 1.55 (0.89, 2.73) | 1.87 (1.08, 3.23) | 0.160 |
| AOR (95% CI) | 1.00 (ref) | 0.81 (0.47, 1.39) | 1.09 (0.66, 1.80) | 1.04 (0.63, 1.73) | 0.720 | 1.00 (ref) | 1.68 (0.96, 2.96) | 1.65 (0.94, 2.91) | 2.01 (1.15, 3.50) | 0.102 |
| Short stature at birth |  |  |  |  |  |  |  |  |  |  |
| Rate (%) | 30 (5.1%) | 18 (3.1%) | 27 (4.6%) | 21 (3.6%) | 0.285 | 26 (4.5%) | 20 (3.4%) | 27 (4.6%) | 23 (4.0%) | 0.729 |
| OR (95% CI) | 1.00 (ref) | 0.59 (0.33, 1.07) | 0.90 (0.53, 1.53) | 0.69 (0.39, 1.23) | 0.291 | 1.00 (ref) | 0.76 (0.42, 1.38) | 1.04 (0.60, 1.81) | 0.88 (0.50, 1.56) | 0.731 |
| AOR (95% CI) | 1.00 (ref) | 0.55 (0.30, 1.01) | 0.84 (0.49, 1.44) | 0.66 (0.37, 1.17) | 0.223 | 1.00 (ref) | 0.69 (0.38, 1.25) | 0.94 (0.54, 1.65) | 0.82 (0.46, 1.47) | 0.623 |
| Big head circumference |  |  |  |  |  |  |  |  |  |  |
| Rate (%) | 86 (14.7%) | 66 (11.4%) | 96 (16.5%) | 69 (11.9%) | 0.036 | 85 (14.6%) | 78 (13.4%) | 82 (14.1%) | 72 (12.4%) | 0.716 |
| OR (95% CI) | 1.00 (ref) | 0.74 (0.53, 1.05) | 1.14 (0.83, 1.57) | 0.78 (0.56, 1.10) | 0.037 | 1.00 (ref) | 0.91 (0.65, 1.26) | 0.96 (0.69, 1.33) | 0.83 (0.59, 1.16) | 0.716 |
| AOR (95% CI) | 1.00 (ref) | 0.70 (0.49, 1.01) | 1.11 (0.81, 1.54) | 0.75 (0.53, 1.06) | 0.022 | 1.00 (ref) | 0.85 (0.61, 1.19) | 0.88 (0.63, 1.23) | 0.76 (0.54, 1.07) | 0.471 |
| Small head circumference |  |  |  |  |  |  |  |  |  |  |
| Rate (%) | 16 (2.7%) | 16 (2.8%) | 30 (5.1%) | 31 (5.3%) | 0.024 | 16 (2.7%) | 24 (4.1%) | 22 (3.8%) | 31 (5.3%) | 0.160 |
| OR (95% CI) | 1.00 (ref) | 1.01 (0.50, 2.03) | 1.93 (1.04, 3.57) | 2.01 (1.08, 3.71) | 0.027 | 1.00 (ref) | 1.52 (0.80, 2.90) | 1.39 (0.72, 2.67) | 1.99 (1.08, 3.69) | 0.168 |
| AOR (95% CI) | 1.00 (ref) | 1.09 (0.53, 2.20) | 2.01 (1.08, 3.76) | 2.05 (1.10, 3.80) | 0.030 | 1.00 (ref) | 1.48 (0.77, 2.84) | 1.40 (0.72, 2.71) | 1.97 (1.05, 3.69) | 0.196 |

SF, serum ferritin; OR odds ratio; AOR, adjusted odds ratio.

Logistic regression models were adjusted for age, BMI, education background, smoking status, alcohol consumption status, conception method, parity, abortion history, thalassemia history and hemoglobin.

**Supplementary table 2** Odds ratios (95% confidence intervals) for the occurrence of adverse maternal and perinatal outcomes according to the mean SF measured at 16-18th and 28-32th weeks of gestation.

| Outcomes | Mean SF concentrations (μg/L) | | | | *P*  trend | Per-SD increase |
| --- | --- | --- | --- | --- | --- | --- |
| Quartile 1  ＜20.45 | Quartile 2  20.45 - 29.20 | Quartile 3  29.20 - 44.15 | Quartile 4  ＞44.15 |
| N | 582 | 583 | 581 | 581 |  |  |
| Premature birth |  |  |  |  |  |  |
| Rate (%) | 24（4.1%） | 33（5.7%） | 28（4.8%） | 31（5.3%） | 0.650 |  |
| OR (95% CI) | 1.00 (ref) | 1.40 (0.81-2.39) | 1.18 (0.67-2.06) | 1.31 (0.76-2.26) | 0.648 | 1.05 (0.87-1.25) |
| AOR (95% CI) | 1.00 (ref) | 1.40 (0.81-2.42) | 1.19 (0.68-2.09) | 1.37 (0.79-2.38) | 0.615 | 1.06 (0.89-1.27) |
| Macrosomia |  |  |  |  |  |  |
| Rate (%) | 23（4.0%） | 29（5.0%） | 19（3.3%） | 15（2.6%） | 0.163 |  |
| OR (95% CI) | 1.00 (ref) | 1.27 (0.73-2.23) | 0.82 (0.44-1.53) | 0.64 (0.33-1.25) | 0.172 | 0.95 (0.75-1.19) |
| AOR (95% CI) | 1.00 (ref) | 1.25 (0.71-2.20) | 0.82 (0.44-1.54) | 0.64 (0.33-1.25) | 0.195 | 0.94 (0.75-1.18) |
| LBW |  |  |  |  |  |  |
| Rate (%) | 24（4.1%） | 25（4.3%） | 22（3.8%） | 25（4.3%） | 0.974 |  |
| OR (95% CI) | 1.00 (ref) | 1.04 (0.59-1.85) | 0.92 (0.51-1.65) | 1.05 (0.59-1.85) | 0.968 | 1.08 (0.89-1.30) |
| AOR (95% CI) | 1.00 (ref) | 1.09 (0.61-1.94) | 0.95 (0.52-1.73) | 1.12 (0.62-1.99) | 0.948 | 1.09 (0.90-1.32) |
| LGA |  |  |  |  |  |  |
| Rate (%) | 70（12.0%） | 70（12.0%） | 72（12.4%） | 58（10.0%） | 0.568 |  |
| OR (95% CI) | 1.00 (ref) | 1.00 (0.70-1.42) | 1.04 (0.73-1.47) | 0.81 (0.56-1.17) | 0.567 | 0.94 (0.83-1.08) |
| AOR (95% CI) | 1.00 (ref) | 0.97 (0.67-1.39) | 1.03 (0.72-1.48) | 0.80 (0.55-1.16) | 0.544 | 0.94 (0.82-1.07) |
| SGA |  |  |  |  |  |  |
| Rate (%) | 37（6.4%） | 25（4.3%） | 44（7.6%） | 60（10.3%） | 0.001 |  |
| OR (95% CI) | 1.00 (ref) | 0.66 (0.39-1.11) | 1.21 (0.77-1.90) | 1.70 (1.11-2.60) | 0.001 | 1.25 (1.10-1.43) |
| AOR (95% CI) | 1.00 (ref) | 0.71 (0.42-1.20) | 1.29 (0.81-2.04) | 1.78 (1.15-2.74) | 0.001 | 1.26 (1.10-1.44) |

SF, serum ferritin; LBW, low birth weight; LGA, large for gestational age; SGA, small for gestational age; OR odds ratio; AOR, adjusted odds ratio.

Logistic regression models were adjusted for age, BMI, education background, smoking status, alcohol consumption status, conception method, parity, abortion history, thalassemia history and hemoglobin.

**Supplementary table 3** Odds ratios (95% confidence intervals) for the occurrence of adverse maternal and perinatal outcomes according to the quartiles of the changes of SF across 16-18th and 28-32th weeks of gestation.

| Outcomes | The changes of SF across 16-18th and 28-32th weeks of gestation (ug/L) | | | | *P*  trend | Per-SD increase |
| --- | --- | --- | --- | --- | --- | --- |
| Quartile 1  ＜-6.58 | Quartile 2  -6.58 - 8.35 | Quartile 3  8.35 - 29.54 | Quartile 4  ＞29.54 |
| N | 582 | 582 | 582 | 581 |  |  |
| Premature birth |  |  |  |  |  |  |
| Rate (%) | 27（4.6%） | 27（4.6%） | 34（5.8%） | 28（4.8%） | 0.755 |  |
| OR (95% CI) | 1.00 (ref) | 1.00 (0.58-1.73) | 1.28 (0.76-2.14) | 1.04 (0.61-1.79) | 0.747 | 1.04 (0.86-1.24) |
| AOR (95% CI) | 1.00 (ref) | 1.01 (0.58-1.74) | 1.31 (0.77-2.20) | 1.10 (0.64-1.89) | 0.714 | 1.06 (0.88-1.27) |
| Macrosomia |  |  |  |  |  |  |
| Rate (%) | 24（4.6%） | 13（4.3%） | 23（3.8%） | 26（2.1%） | 0.177 |  |
| OR (95% CI) | 1.00 (ref) | 0.53 (0.27-1.05) | 0.96 (0.53-1.72) | 1.09 (0.62-1.92) | 0.192 | 1.13 (0.94-1.37) |
| AOR (95% CI) | 1.00 (ref) | 0.54 (0.27-1.07) | 0.95 (0.53-1.72) | 1.08 (0.61-1.91) | 0.214 | 1.13 (0.93-1.36) |
| LBW |  |  |  |  |  |  |
| Rate (%) | 23（4.0%） | 26（4.5%） | 27（4.6%） | 20（3.4%） | 0.744 |  |
| OR (95% CI) | 1.00 (ref) | 1.14 (0.64-2.02) | 1.18 (0.67-2.09) | 0.87 (0.47-1.60) | 0.733 | 1.04 (0.86-1.27) |
| AOR (95% CI) | 1.00 (ref) | 1.14 (0.64-2.04) | 1.24 (0.70-2.19) | 0.90 (0.49-1.66) | 0.721 | 1.05 (0.87-1.28) |
| LGA |  |  |  |  |  |  |
| Rate (%) | 71（12.2%） | 59（10.1%） | 74（12.7%） | 66（11.4%） | 0.543 |  |
| OR (95% CI) | 1.00 (ref) | 0.81 (0.56-1.17) | 1.05 (0.74-1.49) | 0.92 (0.65-1.32) | 0.542 | 0.97 (0.85-1.10) |
| AOR (95% CI) | 1.00 (ref) | 0.80 (0.55-1.16) | 1.02 (0.72-1.46) | 0.90 (0.63-1.29) | 0.549 | 0.96 (0.84-1.09) |
| SGA |  |  |  |  |  |  |
| Rate (%) | 37（6.4%） | 36（6.2%） | 37（6.4%） | 56（9.6%） | 0.061 |  |
| OR (95% CI) | 1.00 (ref) | 0.97 (0.61-1.56) | 1.00 (0.62-1.60) | 1.57 (1.02-2.42) | 0.064 | 1.15 (1.01-1.32) |
| AOR (95% CI) | 1.00 (ref) | 1.01 (0.62-1.63) | 1.03 (0.64-1.65) | 1.61 (1.04-2.50) | 0.066 | 1.15 (1.01-1.32) |

SF, serum ferritin; LBW, low birth weight; LGA, large for gestational age; SGA, small for gestational age; OR odds ratio; AOR, adjusted odds ratio.

Logistic regression models were adjusted for age, BMI, education background, smoking status, alcohol consumption status, conception method, parity, abortion history, thalassemia history and hemoglobin.

**Supplementary table 4** Odds ratios (95% confidence intervals) for the occurrence of adverse maternal and perinatal outcomes according to the trajectory of SF across 16-18th to 28-32th weeks of gestation.

| Outcomes | The trajectory of SF across 16-18th and 28-32th weeks of gestation (ug/L) | | | | *P*  trend |
| --- | --- | --- | --- | --- | --- |
| Low-to-low-level | Low-to-high-level | High-to-low-level | High-to-high-level |
| N | 649 | 515 | 515 | 648 |  |
| Premature birth |  |  |  |  |  |
| Rate (%) | 27（4.2%） | 29（5.6%） | 29（5.6%） | 31（4.8%） | 0.594 |
| OR (95% CI) | 1.00 (ref) | 1.38 (0.80-2.35) | 1.38 (0.80-2.35) | 1.16 (0.68-1.96) | 0.597 |
| AOR (95% CI) | 1.00 (ref) | 1.35 (0.79-2.33) | 1.42 (0.82-2.44) | 1.18 (0.69-2.01) | 0.591 |
| Macrosomia |  |  |  |  |  |
| Rate (%) | 22（3.4%） | 20（3.9%） | 30（5.8%） | 14（2.2%） | 0.011 |
| OR (95% CI) | 1.00 (ref) | 1.15 (0.62-2.13) | 1.76 (0.99-3.10) | 0.63 (0.32-1.24) | 0.014 |
| AOR (95% CI) | 1.00 (ref) | 1.13 (0.60-2.10) | 1.76 (0.99-3.10) | 0.62 (0.31-1.22) | 0.014 |
| LBW |  |  |  |  |  |
| Rate (%) | 23（3.5%） | 26（5.0%） | 22（4.3%） | 25（3.9%） | 0.613 |
| OR (95% CI) | 1.00 (ref) | 1.45 (0.82-2.57) | 1.22 (0.67-2.21) | 1.09 (0.61-1.95) | 0.616 |
| AOR (95% CI) | 1.00 (ref) | 1.46 (0.82-2.61) | 1.25 (0.68-2.28) | 1.15 (0.64-2.06) | 0.625 |
| LGA |  |  |  |  |  |
| Rate (%) | 73（11.2%） | 63（12.2%） | 61（11.8%） | 73（11.3%） | 0.944 |
| OR (95% CI) | 1.00 (ref) | 1.10 (0.77-1.58) | 1.06 (0.74-1.52) | 1.01 (0.71-1.41) | 0.944 |
| AOR (95% CI) | 1.00 (ref) | 1.09 (0.76-1.57) | 1.06 (0.74-1.54) | 0.99 (0.70-1.42) | 0.949 |
| SGA |  |  |  |  |  |
| Rate (%) | 38（5.9%） | 31（6.0%） | 40（7.8%） | 57（8.8%） | 0.134 |
| OR (95% CI) | 1.00 (ref) | 1.03 (0.63-1.68) | 1.35 (0.86-2.15) | 1.55 (1.01-2.37) | 0.137 |
| AOR (95% CI) | 1.00 (ref) | 1.06 (0.65-1.74) | 1.36 (0.85-2.16) | 1.63 (1.06-2.51) | 0.105 |

SF, serum ferritin; LBW, low birth weight; LGA, large for gestational age; SGA, small for gestational age; OR odds ratio; AOR, adjusted odds ratio.

Logistic regression models were adjusted for age, BMI, education background, smoking status, alcohol consumption status, conception method, parity, abortion history, thalassemia history and hemoglobin.
